# Supplementary material for: Inflow cannula position as risk factor for stroke in patients with HeartMate 3 left ventricular assist devices
Source: PubMed Central journal article supplement — Artif Organs. 2022 Jan 9;46(6):1149–57. doi: 10.1111/aor.14165 (PMC9305857; doi:10.1111/aor.14165), 2022-01-09
Supplement: AOR-46-1149-s001.pdf [file AOR-46-1149-s001.pdf]

**Supplementary Table S1:** Longitudinal data of inflow cannula angle from first standing to 6 and 12 months post-implantation\*

| <b>IC angle (°)</b><br>median (IQR) or mean±SD                    | <b>First standing</b><br>POD: 33.5 (41.0) days | <b>6 months</b><br>POD: 187.0 (36.0) days | <b>12 months</b><br>POD: 354.0 (54.5) days | <b>p-value</b> |
|-------------------------------------------------------------------|------------------------------------------------|-------------------------------------------|--------------------------------------------|----------------|
| All patients (n=23)                                               | 13.4 (11.4)                                    | 10.5 (10.4)                               | 10.5 (12.4)                                | 0.96           |
| No stroke (n=18)                                                  | 11.9±10.4                                      | 11.8±10.7                                 | 11.8±11.1                                  | 0.99           |
| Ischemic stroke (n=3)                                             | -3.9±13.6                                      | -8.2±13.7                                 | -7.0±15.8                                  | 0.77           |
| Intracranial Hemorrhage (n=4)                                     | 11.4 (25.8)                                    | 10.5 (25.7)                               | 11.6 (27.8)                                | 0.47           |
| <b>Absolute change in IC angle (°)</b><br>median (IQR) or mean±SD | <b>First standing to 6 months</b>              | <b>6 to 12 months</b>                     | <b>First standing to 12 months</b>         | <b>p-value</b> |
| All patients (n=23)                                               | 0.5 (4.2)                                      | 0.1 (5.3)                                 | 0.1 (9.1)                                  | 0.74           |
| No stroke (n=18)                                                  | -0.07±4.3                                      | -0.02±3.6                                 | -0.09±5.2                                  | 0.99           |
| Ischemic stroke (n=3)                                             | -4.3±10.6                                      | 1.2±3.1                                   | -3.0±13.7                                  | 0.50           |
| Intracranial Hemorrhage (n=4)                                     | 1.7±3.3                                        | 3.1±3.1                                   | 4.9±5.9                                    | 0.19           |

\*Only patients with 3 appropriate X-rays and measurable inflow cannula were included in this sub-analysis

IC, inflow cannula; POD, postoperative day

**Supplementary Table S2:** Baseline demographics, hemodynamic and laboratory parameters stratified by inflow cannula angle <10° vs. >10°

| n (%), median (IQR) or mean±SD            | IC angle <10°<br>(n=15) | IC angle >10°<br>(n=20) | p-value |
|-------------------------------------------|-------------------------|-------------------------|---------|
| <b>Patient characteristics</b>            |                         |                         |         |
| Sex (female)                              | 3 (13.3)                | 1 (5.0)                 | 0.56    |
| Age at implant (years)                    | 63.3±7.0                | 62.2±9.1                | 0.69    |
| BMI (kg/m <sup>2</sup> )                  | 28.1±6.2                | 29.7±4.3                | 0.36    |
| INTERMACS level                           |                         |                         | 0.95    |
| 1                                         | 3 (20.0)                | 4 (20.0)                |         |
| 2                                         | 2 (13.3)                | 1 (5.0)                 |         |
| 3                                         | 2 (13.3)                | 4 (20.0)                |         |
| 4–7                                       | 8 (53.0)                | 11 (55.0)               |         |
| Cardiomyopathy                            |                         |                         | 0.48    |
| Ischemic                                  | 8 (53.3)                | 12 (60.0)               |         |
| Dilated                                   | 7 (46.7)                | 8 (40.0)                |         |
| Strategy                                  |                         |                         | 0.77    |
| Destination therapy                       | 7 (46.7)                | 7 (35.0)                |         |
| Bridge to transplantation                 | 3 (20.0)                | 6 (30.0)                |         |
| Bridge to candidacy                       | 5 (33.3)                | 7 (35.0)                |         |
| Implantation technique, minimal invasive  | 4 (26.7)                | 5 (25.0)                | 0.91    |
| Intraoperative bypass support             |                         |                         | 1.00    |
| HLM                                       | 14 (93.3)               | 19 (95.0)               |         |
| Off pump                                  | 1 (6.7)                 | 1 (6.7)                 |         |
| Præ ECLS                                  | 3 (20.0)                | 4 (20.0)                | 1.00    |
| Stroke history                            | 1 (6.7)                 | 6 (31.6)                | 0.10    |
| Diabetes                                  | 5 (35.7)                | 6 (30.0)                | 0.73    |
| Hypertension                              | 6 (42.9)                | 14 (73.7)               | 0.15    |
| Atrial fibrillation                       | 9 (60.0)                | 12 (63.2)               | 0.85    |
| <b>Laboratory parameters</b>              |                         |                         |         |
| Hemoglobin (g/dl)                         | 10.5±1.5                | 11.0±1.1                | 0.23    |
| Lactate dehydrogenase (U/l)               | 251.1±74.3              | 251.1±53.4              | 0.99    |
| Total bilirubin (mg/dl)                   | 0.5 (0.4)               | 0.6 (0.3)               | 0.83    |
| Serum creatinine (mg/dl)                  | 1.2 (0.4)               | 0.9 (0.5)               | 0.22    |
| C-reactive protein (mg/dl)                | 4.2 (7.7)               | 1.7 (2.1)               | 0.14    |
| Leucocytes (g/dl)                         | 9.3±3.0                 | 7.5±2.3                 | 0.06    |
| INR                                       | 2.4±0.4                 | 2.3±0.4                 | 0.81    |
| NT-proBNP (pg/mL)                         | 2245.0 (2645.5)         | 2052.0 (1730.0)         | 0.31    |
| <b>Hemodynamic parameters</b>             |                         |                         |         |
| Pump speed (rpm)                          | 5535±322                | 5370±263                | 0.11    |
| Central venous pressure (mmHg)            | 13.1±2.8                | 10.9±2.4                | 0.02    |
| Mean pulmonary artery pressure (mmHg)     | 29.7±10.1               | 29.2±6.4                | 0.87    |
| Pulmonary capillary wedge pressure (mmHg) | 18.0 (5.0)              | 13.0 (5.0)              | 0.23    |
| Mean arterial blood pressure (mmHg)       | 76.5 (14.7)             | 75.0 (7.0)              | 0.56    |
| Cardiac index (l/min/m <sup>2</sup> )     | 2.1±0.3                 | 2.2±0.1                 | 0.63    |

Hemodynamic parameters were obtained before discharge from the intensive care unit during index hospitalization in 28 patients (n=10 IC angle <10° and n=18 IC angle >10°); Laboratory parameters assessed at the time of the first standing X-ray.

BMI, body mass index; INTERMACS, Interagency Registry for Mechanically Assisted Circulatory Support; HLM, heart lung machine; ECLS, extracorporeal life support; IC, inflow cannula; INR, International Normalized Ratio; NT-proBNP, N-terminal pro-brain natriuretic peptide

**Supplementary Table S3:** Individual and overall clinical parameters at the day of ischemic stroke

| Clinical parameters at the day of ischemic stroke | Patient #1 | Patient #2      | Patient #3               | Patient #4      | Patient #5 | Patient #6 | Patient #7 | Patient #8           | All patients (n=8)<br>n (%), median (IQR) or mean±SD                      |
|---------------------------------------------------|------------|-----------------|--------------------------|-----------------|------------|------------|------------|----------------------|---------------------------------------------------------------------------|
| 7POD event                                        | 40         | 207             | 463                      | 355             | 97         | 18         | 27         | 222                  | 178.6±164.5                                                               |
| 8Device position parameters                       |            |                 |                          |                 |            |            |            |                      |                                                                           |
| 9 POD first standing X-ray (days)                 | 61         | 47              | 36                       | 76              | 32         | 11         | 36         | 32                   | 41.4±19.9                                                                 |
| 10 IC angle (°)                                   | 7.9        | 4.1             | -18.3                    | 8.8             | -12.1      | 9.7        | -2.3       | not visible          | 4.1 (20.9)                                                                |
| 11Anticoagulation therapy                         |            |                 |                          |                 |            |            |            |                      |                                                                           |
| 12 Regime at the event                            | Heparin    | VKA             | Heparin + VKA (bridging) | Heparin         | VKA        | VKA        | Heparin    | LMWH                 | 3 (37.5) Heparin<br>1 (12.5) Heparin+VKA<br>3 (37.5) VKA<br>1 (12.5) LMWH |
| 16 Previous sub-therapeutic anticoagulation*      | no         | no              | no                       | yes             | unknown    | no         | no         | no                   | 6 (75.0) no<br>1 (12.5) yes<br>1 (12.5) unknown                           |
| 18 ASA daily dose at the event (mg)               | 100        | 100             | 100                      | 100             | 100        | 100        | 100        | 100                  | 100±0.0                                                                   |
| 19 Previous modification of ASA therapy           | no         | no              | no                       | no              | no         | no         | no         | no                   | 8 (100) no                                                                |
| 21Laboratory parameters                           |            |                 |                          |                 |            |            |            |                      |                                                                           |
| 22 Hemoglobin (g/dl)                              | 8.9        | 12.3            | 9.7                      | 8.4             | n.a.       | 11.7       | 9.9        | 9.5                  | 10.1±1.4                                                                  |
| 23 Lactate dehydrogenase (U/l)                    | 515        | 273             | 189                      | n.a.            | n.a.       | 243        | 220        | 273                  | 285.5±47.7                                                                |
| 24 Total bilirubin (mg/dl)                        | 0.7        | 0.5             | 0.8                      | 1.8             | n.a.       | 0.8        | 0.3        | 0.8                  | 0.8±0.5                                                                   |
| 25 Serum creatinine (mg/dl)                       | 3.2        | 1.3             | 0.9                      | 4.0             | n.a.       | 1.1        | 0.7        | 1.7                  | 1.8±1.3                                                                   |
| 26 C-reactive protein (mg/dl)                     | 8.1        | 26.6            | 3.4                      | 31.9            | n.a.       | 7.1        | 9.6        | 7.0                  | 8.1 (19.6)                                                                |
| 27 Leucocytes (g/dl)                              | 6.9        | 15.6            | 8.5                      | 13.9            | n.a.       | 7.3        | 7.3        | 15.9                 | 11.2±4.9                                                                  |
| 28 INR                                            | n.a.       | 2.0             | 1.9                      | 1.9             | n.a.       | 2.1        | n.a.       | n.a.                 | 2.0±0.1                                                                   |
| 28 aPTT (sec)                                     | 64.5       | n.a.            | 56.0                     | 51.7            | n.a.       | 49.5       | 49.2       | n.a.                 | 54.2±6.4                                                                  |
| 29 NT-proBNP (pg/mL)                              | 1843       | 5888            | 12680                    | n.a.            | n.a.       | 1454       | 2245       | 4276                 | 4731±4242                                                                 |
| 30Hemodynamic parameters                          |            |                 |                          |                 |            |            |            |                      |                                                                           |
| 31 Mean arterial blood pressure (mmHg)            | 80         | 70              | 70                       | 65              | 88         | 79         | 89         | 90                   | 78.9±9.7                                                                  |
| 32Adverse events                                  |            |                 |                          |                 |            |            |            |                      |                                                                           |
| 34 Previous adverse events                        | no         | Major infection | GIB                      | Major infection | no         | RHF        | no         | GIB, major infection | 3 (37.5) no<br>5 (62.5) yes                                               |
| 36 Previous readmissions                          | no         | no              | yes                      | no              | no         | yes        | no         | yes                  | 5 (62.5) no<br>3 (37.5) yes                                               |

1  
2  
3  
4  
5  
6  
7  
8  
9  
10  
11  
12  
13  
14  
15  
16  
17  
18  
19  
20  
21  
22  
23  
24  
25  
26  
27  
28  
29  
30  
31  
32  
33  
34  
35  
36  
37  
38  
39  
40  
41  
42  
43  
44  
45  
46

\*Based on regime at the event any INR<2, aPTT<45sec or anti-Xa<0.2 IU one week preceding the event was considered sub-therapeutic

POD, postoperative day; IC, inflow cannula; aPTT, activated Partial Thromboplastin Time; ASA, acetylicylic acid; n.a., not available; LMWH, low-molecular weight heparin (enoxaparin); VKA, vitamin K antagonist; GIB, gastrointestinal bleeding; RHF, right heart failure

For Review Only
